# Supplementary material for: Prediction and analysis of protein solubility using a novel scoring card method with dipeptide composition
Source: Springer Nature journal article supplement (doi:10.1186/1471-2105-13-s17-s3), 2012-12-01
Supplement: 12859_2012_5467_MOESM1_ESM.pdf [file 12859_2012_5467_MOESM1_ESM.pdf]

**Table S1. The scores of the initial SSM using Sd957**

|   | A    | C   | D   | E   | F   | G   | H   | I   | K   | L   | M   | N   | P   | Q   | R   | S   | T   | V   | W   | Y   |
|---|------|-----|-----|-----|-----|-----|-----|-----|-----|-----|-----|-----|-----|-----|-----|-----|-----|-----|-----|-----|
| A | 794  | 354 | 550 | 727 | 475 | 504 | 369 | 305 | 622 | 736 | 424 | 291 | 250 | 619 | 717 | 393 | 549 | 617 | 307 | 290 |
| C | 263  | 309 | 271 | 326 | 288 | 207 | 292 | 316 | 308 | 281 | 323 | 292 | 277 | 313 | 289 | 308 | 344 | 358 | 350 | 345 |
| D | 341  | 280 | 408 | 709 | 329 | 155 | 326 | 520 | 495 | 528 | 392 | 370 | 424 | 408 | 475 | 236 | 381 | 339 | 294 | 314 |
| E | 871  | 276 | 520 | 578 | 337 | 506 | 446 | 701 | 418 | 525 | 294 | 300 | 446 | 431 | 421 | 442 | 346 | 440 | 284 | 329 |
| F | 314  | 309 | 343 | 363 | 320 | 312 | 301 | 206 | 334 | 290 | 341 | 281 | 254 | 261 | 516 | 272 | 356 | 363 | 387 | 293 |
| G | 557  | 255 | 400 | 377 | 327 | 150 | 338 | 271 | 438 | 382 | 338 | 62  | 269 | 335 | 305 | 208 | 339 | 419 | 294 | 205 |
| H | 362  | 326 | 334 | 349 | 286 | 317 | 373 | 360 | 325 | 284 | 337 | 264 | 362 | 329 | 310 | 243 | 307 | 261 | 318 | 298 |
| I | 587  | 333 | 579 | 448 | 382 | 375 | 329 | 234 | 357 | 296 | 363 | 408 | 348 | 269 | 280 | 244 | 355 | 367 | 342 | 309 |
| K | 526  | 288 | 420 | 465 | 336 | 354 | 424 | 349 | 333 | 291 | 338 | 287 | 414 | 341 | 283 | 387 | 290 | 403 | 266 | 380 |
| L | 1000 | 265 | 473 | 598 | 343 | 373 | 271 | 350 | 346 | 314 | 345 | 381 | 281 | 269 | 273 | 242 | 314 | 217 | 254 | 240 |
| M | 326  | 352 | 369 | 362 | 290 | 206 | 300 | 294 | 286 | 396 | 348 | 387 | 349 | 332 | 346 | 328 | 377 | 392 | 304 | 301 |
| N | 613  | 353 | 285 | 276 | 243 | 130 | 286 | 407 | 417 | 340 | 297 | 457 | 340 | 261 | 176 | 224 | 254 | 327 | 306 | 244 |
| P | 443  | 305 | 303 | 460 | 277 | 391 | 297 | 303 | 272 | 313 | 344 | 314 | 270 | 295 | 280 | 202 | 474 | 235 | 292 | 323 |
| Q | 471  | 323 | 277 | 408 | 357 | 295 | 349 | 409 | 349 | 296 | 309 | 328 | 313 | 233 | 263 | 283 | 356 | 254 | 320 | 331 |
| R | 447  | 251 | 439 | 535 | 224 | 416 | 275 | 502 | 330 | 323 | 324 | 309 | 338 | 390 | 357 | 253 | 284 | 403 | 296 | 250 |
| S | 457  | 229 | 265 | 272 | 235 | 306 | 151 | 286 | 369 | 269 | 213 | 321 | 210 | 303 | 300 | 0   | 258 | 302 | 253 | 311 |
| T | 331  | 346 | 356 | 340 | 413 | 286 | 291 | 313 | 466 | 350 | 399 | 284 | 337 | 299 | 262 | 319 | 170 | 513 | 311 | 274 |
| V | 374  | 298 | 503 | 512 | 277 | 528 | 283 | 517 | 304 | 348 | 337 | 375 | 304 | 347 | 535 | 158 | 320 | 400 | 321 | 216 |
| W | 367  | 290 | 364 | 396 | 369 | 248 | 325 | 266 | 205 | 293 | 327 | 307 | 299 | 284 | 278 | 270 | 312 | 286 | 326 | 320 |
| Y | 434  | 318 | 266 | 411 | 301 | 206 | 345 | 301 | 191 | 289 | 305 | 203 | 302 | 199 | 273 | 294 | 272 | 360 | 304 | 300 |
