# Supplementary material for: Prediction and analysis of protein solubility using a novel scoring card method with dipeptide composition
Source: Springer Nature journal article supplement (doi:10.1186/1471-2105-13-s17-s3), 2012-12-01
Supplement: 12859_2012_5467_MOESM2_ESM.pdf [file 12859_2012_5467_MOESM2_ESM.pdf]

**Table S2. 10 independent runs of the scoring card method on Sd726**

| <b>Exp.</b> | <b>Fitness</b> | <b>Train (%)</b> | <b>Test (%)</b> | <b>Sensitivity</b> | <b>Specificity</b> | <b>AUC</b> | <b>R</b> | <b>Threshold</b> |
|-------------|----------------|------------------|-----------------|--------------------|--------------------|------------|----------|------------------|
| 1           | 0.919          | 84.709           | 83.333          | 0.783              | 0.857              | 0.913      | 0.970    | 451.597          |
| 2           | 0.918          | 85.933           | 85.933          | 0.697              | 0.935              | 0.912      | 0.977    | 450.736          |
| 3           | 0.920          | 85.168           | 83.333          | 0.739              | 0.878              | 0.914      | 0.973    | 464.915          |
| 4           | 0.921          | 85.015           | 85.015          | 0.654              | 0.942              | 0.915      | 0.974    | 456.741          |
| 5           | 0.912          | 83.486           | 83.333          | 0.652              | 0.918              | 0.905      | 0.978    | 449.592          |
| 6           | 0.916          | 84.557           | 86.111          | 0.652              | 0.959              | 0.908      | 0.984    | 453.463          |
| 7           | 0.920          | 85.321           | 81.944          | 0.565              | 0.939              | 0.915      | 0.960    | 454.259          |
| 8           | 0.918          | 85.168           | 81.944          | 0.696              | 0.878              | 0.912      | 0.977    | 457.896          |
| 9           | 0.921          | 85.168           | 80.556          | 0.652              | 0.878              | 0.916      | 0.970    | 457.747          |
| 10          | 0.920          | 84.098           | 83.333          | 0.609              | 0.939              | 0.914      | 0.975    | 454.408          |
| <b>Avg.</b> | 0.919          | 84.862           | 83.484          | 0.670              | 0.912              | 0.913      | 0.974    | 455.135          |
| <b>Sd.</b>  | 0.003          | 0.688            | 1.784           | 0.062              | 0.036              | 0.004      | 0.006    | 4.464            |
