# Supplementary material for: Prediction and analysis of protein solubility using a novel scoring card method with dipeptide composition
Source: Springer Nature journal article supplement (doi:10.1186/1471-2105-13-s17-s3), 2012-12-01
Supplement: 12859_2012_5467_MOESM3_ESM.pdf [file 12859_2012_5467_MOESM3_ESM.pdf]

**Table S3. The optimized solubility scoring matrix of amino acids**

| Amino acid | Score   |
|------------|---------|
| A-Ala      | 599.425 |
| C-Cys      | 363.825 |
| D-Asp      | 507.95  |
| E-Glu      | 570.85  |
| F-Phe      | 420.125 |
| G-Gly      | 378.05  |
| H-His      | 406.175 |
| I-Ile      | 414.75  |
| K-Lys      | 445.275 |
| L-Leu      | 440.725 |
| M-Met      | 420.875 |
| N-Asn      | 376.65  |
| P-Pro      | 406.225 |
| G-Gln      | 400.025 |
| R-Arg      | 370.575 |
| S-Ser      | 334.1   |
| T-Thr      | 411.025 |
| V-Val      | 424.175 |
| W-Trp      | 350.0   |
| Y-Tyr      | 339.8   |
